# Supplementary material
Source: PubMed Central journal article supplement (PMC3767567)
Supplement: 1314242110_sapp.pdf [file 1314242110_sapp.pdf]

# Supporting Information Appendix

## SI Text

**Spectroscopic Details.** Low temperature absorption data were collected on a Cary-17 spectrometer using a Janis Research Super Vari-Temp cryogenic Dewar mounted in the optical path. MCD measurements were performed on Jasco J810 (UV/vis, S1 and S20 PMT detection) and J730 (NIR, liquid N<sub>2</sub>-cooled InSb detection) spectropolarimeters equipped with an Oxford Instruments SM4000-7T superconducting magnet/cryostats. The MCD spectra were corrected for the natural CD and zero-field baseline effects caused by glass strain by averaging the positive and negative field data at 5 K ( $[7T - (-)7T]/2$ ). Samples of ~1 mM Cu<sub>A</sub>-containing protein in ammonium acetate buffer (pH 5.5) for wt Cu<sub>A</sub> azurin and M123X (X=Q, L, H) mutants were diluted with glycerol-*d*<sub>3</sub> (~50% v/v) and injected into sample cells composed of two quartz disks separated by a Viton O-ring spacer. The concentrations of the protein were determined by EPR spin quantitation. Resonance Raman (RR) spectra were obtained by collecting scattered light dispersed through a triple monochromator (Spex 1877 CP, with 1,200, 1,800, and 2,400 grooves/millimeter holographic spectrograph gratings) and detecting with an Andor Newton charge-coupled device (CCD) detector cooled to -80 °C. Excitation was provided by a Coherent Innova Sabre 25/7 Ar<sup>+</sup> CW ion laser (476.5 nm, ~20 mW). The spectral resolution was ~2 cm<sup>-1</sup>. The samples were cooled to 77 K in a quartz liquid nitrogen (LN<sub>2</sub>) finger dewar (Wilmad). EPR spectra were obtained by using a Bruker EMX spectrometer, ER 041 XG microwave bridge, and ER 4102ST cavity. All X band samples were run at 77 K in a LN<sub>2</sub> finger dewar. A Cu<sup>2+</sup> standard (1.0 mM CuSO<sub>4</sub>•5H<sub>2</sub>O with 2 mM HCl and 2 M NaClO<sub>4</sub>) was used for spin quantitation of the EPR spectra.

**Computational Details.** The DFT models were taken directly from either X-ray structures of the engineered Cu<sub>A</sub> Az (PDB ID: 1CC3) or BC (PDB ID: 4AZU). For Cu<sub>A</sub>, these consist of protein the backbone loop connecting the to two bridged S(Cys) residues as well as the equatorial N(His) residues and the corresponding axial residues for WT and M123X (X=Q, L, H) mutants. Geometry optimizations were calculated using the hybrid B3LYP exchange-correlation functional with tight SCF convergence criteria (10<sup>-8</sup> au) and mixed triple- $\zeta$ /double- $\zeta$  (TZVP on Cu, S, N and 6-31G\* on the other atoms) basis sets (1-3). Partial geometry optimizations were performed with the positions of the protein backbone C, N, and O atoms frozen to the X-ray structure positions. Ionization energies (IEs) have been calculated using the difference in total SCF energy (PCM corrected,  $\epsilon = 4.0$ ) between the fully optimized reduced and oxidized structures. The IE's are related to E<sup>0</sup> by:  $E^0$  (eV) = IE - 4.5 + U, where -4.5 eV converts vacuum to the normal hydrogen electrode, and U is the solvation term. Only IEs relative to WT Cu<sub>A</sub> Az are reported. For the calculation of axial bond strength and  $\lambda_i$  for Cu<sub>A</sub> and BC, the constrained S(Met) residue was replaced by dimethyl thioether. The [(Im)(S(CH<sub>3</sub>)<sub>2</sub>)Cu(SCH<sub>3</sub>)<sub>2</sub>Cu(Im)(CH<sub>3</sub>CONHCH<sub>3</sub>)] Cu<sub>A</sub> model was used for the time-dependent DFT (TD-DFT) calculated excited state slopes (energies and intensities of the 30 lowest-energy, spin-allowed electronic transitions were calculated). For the calculated absorption spectra energies and intensities were transformed with the SWizard program into simulated spectra using Gaussians with full-width half-maxima of 1350 cm<sup>-1</sup> (4). All

DFT calculations were performed using the program Gaussian 03/09 in the spin-unrestricted formalism (5). EPR spin Hamiltonian parameters were calculated using the ORCA program with hybrid functional B3LYP and the CoreProp basis set for Cu and the SVP basis set for other atoms. These basis sets are the TurboMole DZ basis sets developed by Ahlrichs and coworkers and were obtained from the basis set library (6-9).

## References

1. Perdew JP (1986) Density-functional approximation for the correlation energy of the inhomogeneous electron gas *Phys. Rev. B* 33:8822-8824.
2. Becke AD (1988) Density-functional exchange-energy approximation with correct asymptotic behavior *Phys. Rev. A* 38:3098-3100.
3. Becke AD (1993) Density-functional thermochemistry III. The role of exact exchange *J. Chem. Phys.* 98:5648-5653.
4. Gorelsky SI (1999) *SWizard*; Department of Chemistry, York University: Toronto, ON, <http://www.sg-chem.net>.
5. Frisch, M. J.; *Gaussian 03*, revision C.02; Gaussian, Inc.: Wallingford, CT, 2004.
6. Neese F ORCA, version 2.5; Universität Bonn: Bonn, Germany. The program is available free of charge at <http://www.thch.uni-bonn.de/tc/orca>.
7. Neese F (2002) Prediction and interpretation of the  $^{57}\text{Fe}$  isomer shift in Mössbauer spectra by density functional theory *Inorg Chim Acta* 337:181–192.
8. Schäfer A, Horn H, & Ahlrichs R (1992) Fully optimized contracted Gaussian basis sets for atoms Li to Kr *J Chem Phys* 97:2571–2577.
9. See: <ftp.chemie.unikarlsruhe.de/pub/basen>
10. Hwang HJ & Lu Y (2004) pH-dependent transition between delocalized and trapped valence states of a  $\text{Cu}_A$  center and its possible role in proton-coupled electron transfer. *Proc Natl Acad Sci USA* 101(35):12842-12847.

(A)

- $\nu_1 (A_g) = \text{Cu}_2\text{S}_2$  "accordion" mode
- $\nu_2 (A_g) = \text{mixed Cu-S/Cu-N stretching modes}$
- $\nu_3 (B_{1g}) = \text{out-of-phase twisting Cu-S stretching}$
- $\nu_4 (A_g) = \text{symmetric breathing mode}$

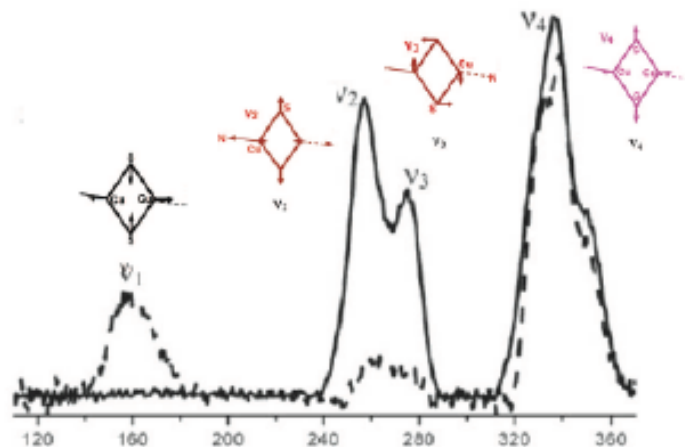

(B)

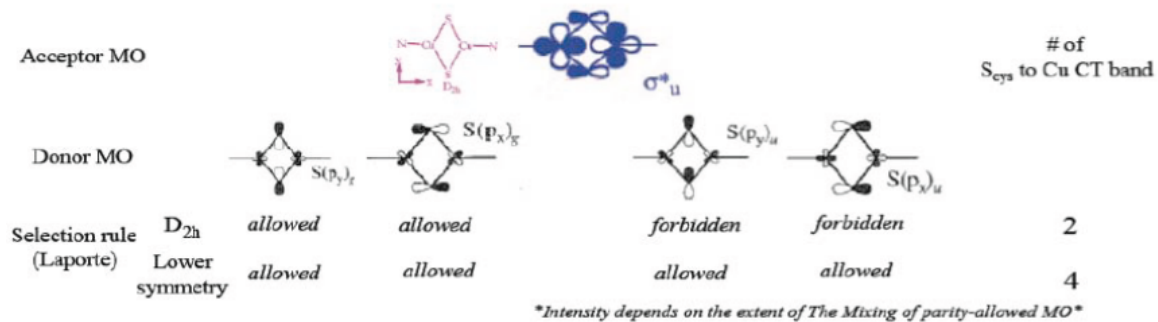

**Fig. S1.** Schematic representation for: (A) the symmetry of the four vibration modes associated with the  $[\text{Cu}_2\text{S}_2]$  core, and (B) the selection rules for  $S_{Cys}$  to Cu CT bands in  $D_{2h}$  and lower molecular symmetry.

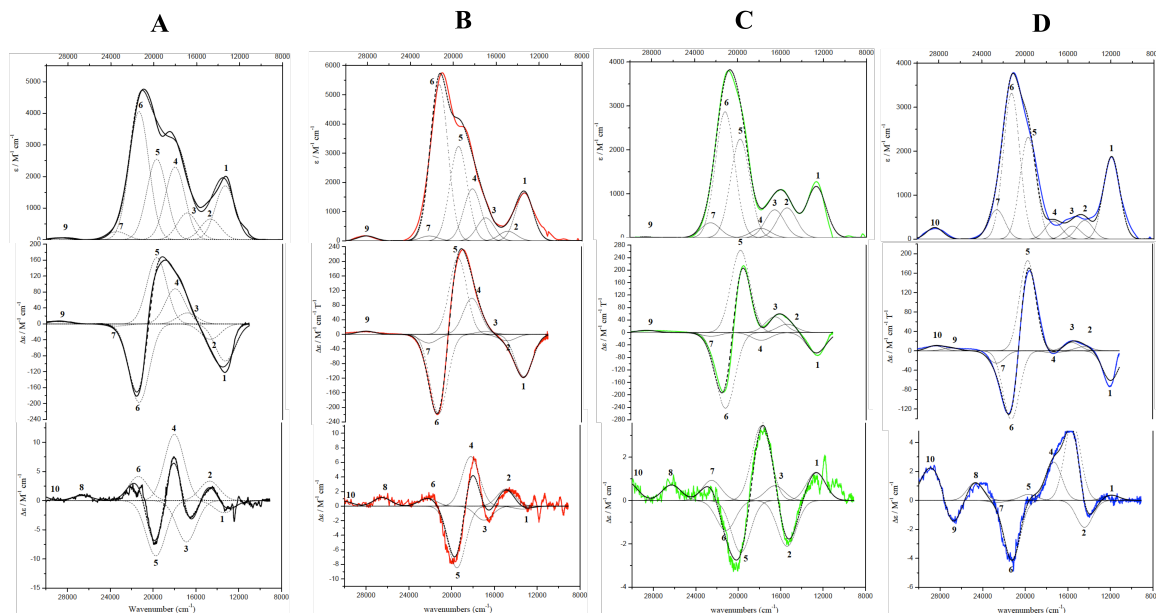

**Fig. S2.** The LT Abs/MCD/CD spectra of (A) WT (B) M123Q (C) M123L (D) M123H and the peaks are resolved by simultaneous fitting.

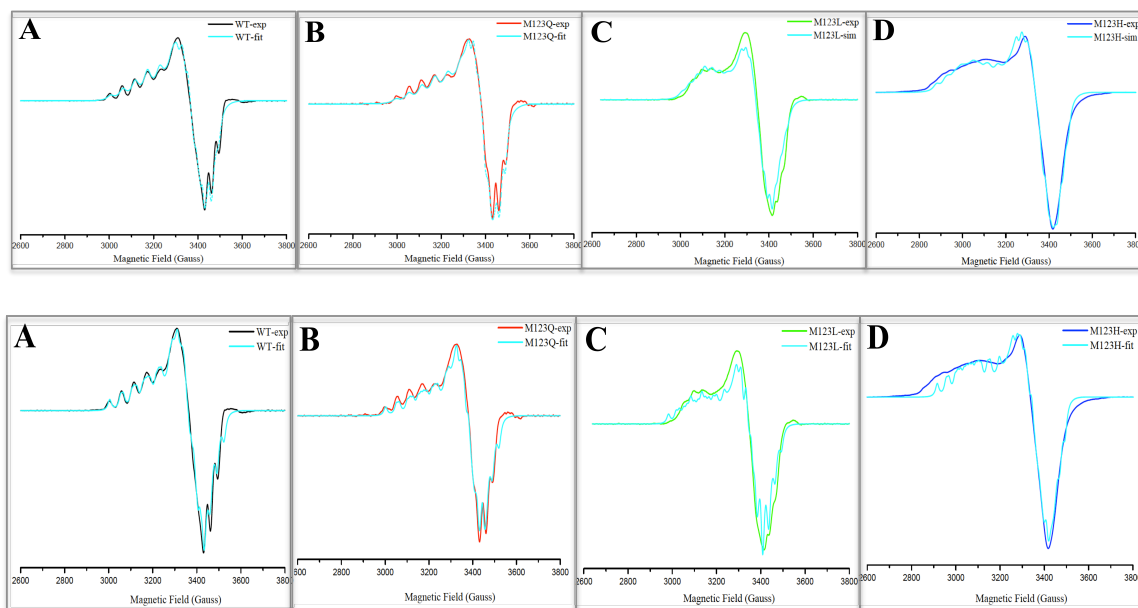

**Fig. S3.** Overlay of experimental and simulated EPR spectra of (A) WT; (B) M123Q; (C) M123L; and (D) M123H. Top and Bottom show two different simulations. Top: simulation allowed for the bandwidth of A-values to float. Bottom: The bandwidth of A-values are fixed. Parameters from the simulations are given in Table S2.

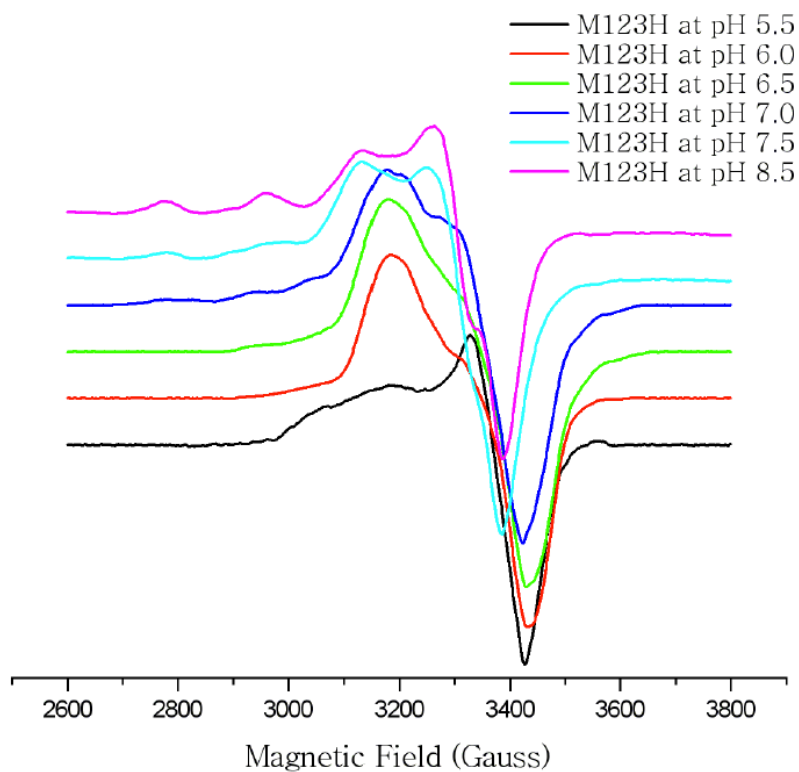

**Fig. S4.** pH-dependent X-band EPR spectra of the M123H variant. Note that WT Cu<sub>A</sub> azurin transforms into a type 2 Cu site at pH ~8.5. (Purple spectrum, Ref 10)

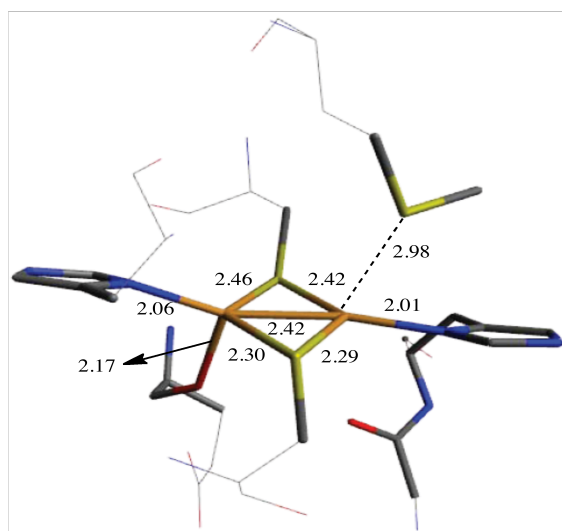

**Fig. S5.** Schematic representation of the 1.65 Å resolution X-ray structure of engineered Cu<sub>A</sub> azurin (PDB ID: 1CC3).

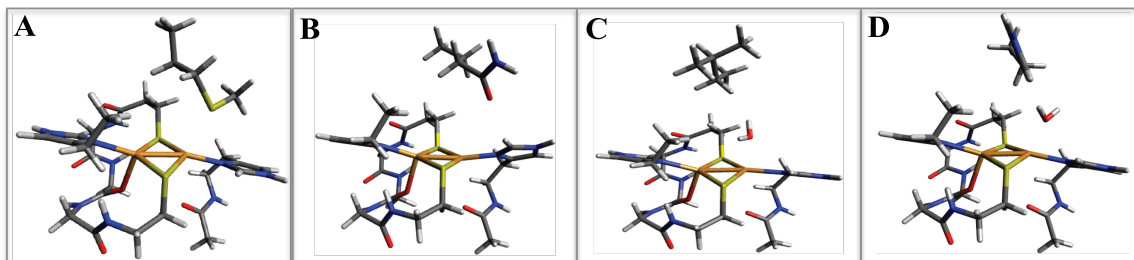

**Fig. S6.** Schematic representation for DFT-optimized structures: (A) WT; (B) M123Q; (C) M123L; and (D) M123H.

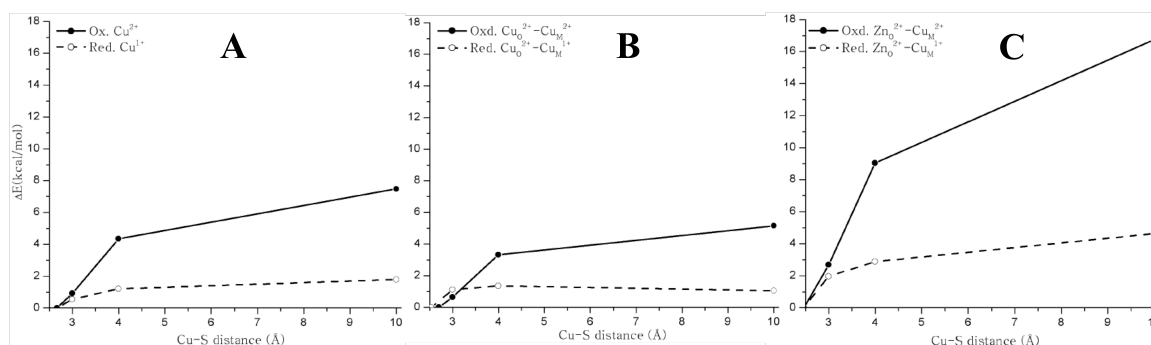

**Fig. S7.** PESs as a function of Cu-S(thioether) distance for: (A) blue copper; (B) delocalized  $[\text{Cu}_\text{O}-\text{Cu}_\text{M}]$ ; and (C) localized  $[\text{Zn}_\text{O}-\text{Cu}_\text{M}]$ . Solid line, oxidized Cu site; dashed line, reduced Cu site.

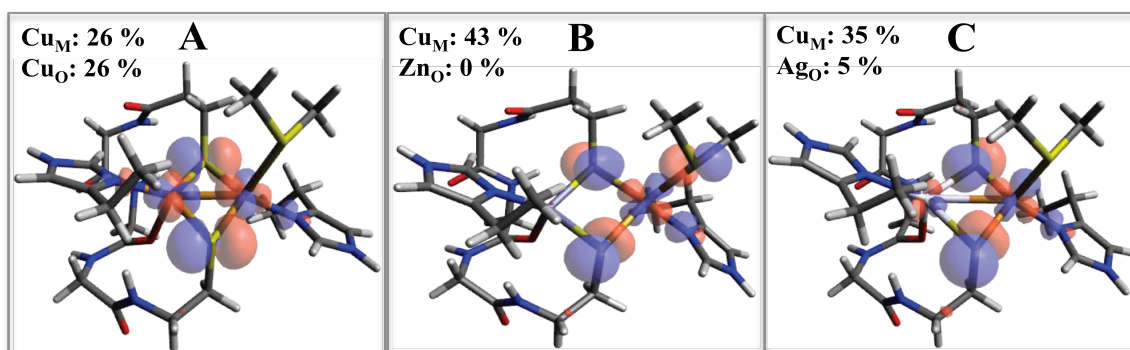

**Fig. S8.** The orbital populations and  $\beta$ -LUMO contours for (A)  $[\text{Cu}^{1.5+}-\text{Cu}^{1.5+}]$ ; (B)  $[\text{Zn}^{2+}-\text{Cu}^{2+}]$ ; and (C)  $[\text{Ag}^{1+}-\text{Cu}^{2+}]$  models.

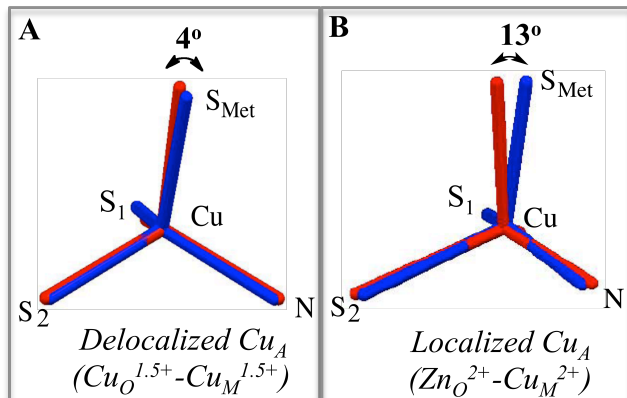

**Fig. S9.** Overlays of reduced (red) and oxidized (blue)  $\text{Cu}_A$  DFT structures for: (A) delocalized  $[\text{Cu}_O\text{-Cu}_M]$  and (B) localized  $[\text{Zn}_O\text{-Cu}_M]$  (only Cu and coordinated N, S atoms are shown for clarity). The arrows indicate a rotation of the angle between the  $\text{S}(\text{Met})\text{-Cu-S}_1(\text{Cys})$  and  $\text{N}(\text{His})\text{-Cu-S}_2(\text{Cys})$  planes.

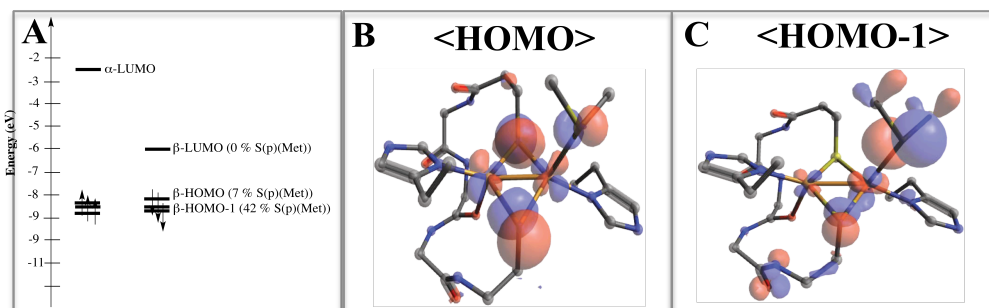

**Fig. S10.** Energy diagram (A) and selected orbital contours of the HOMO (B) and HOMO-1 (C) of the  $\sigma_u^*$  ground state.

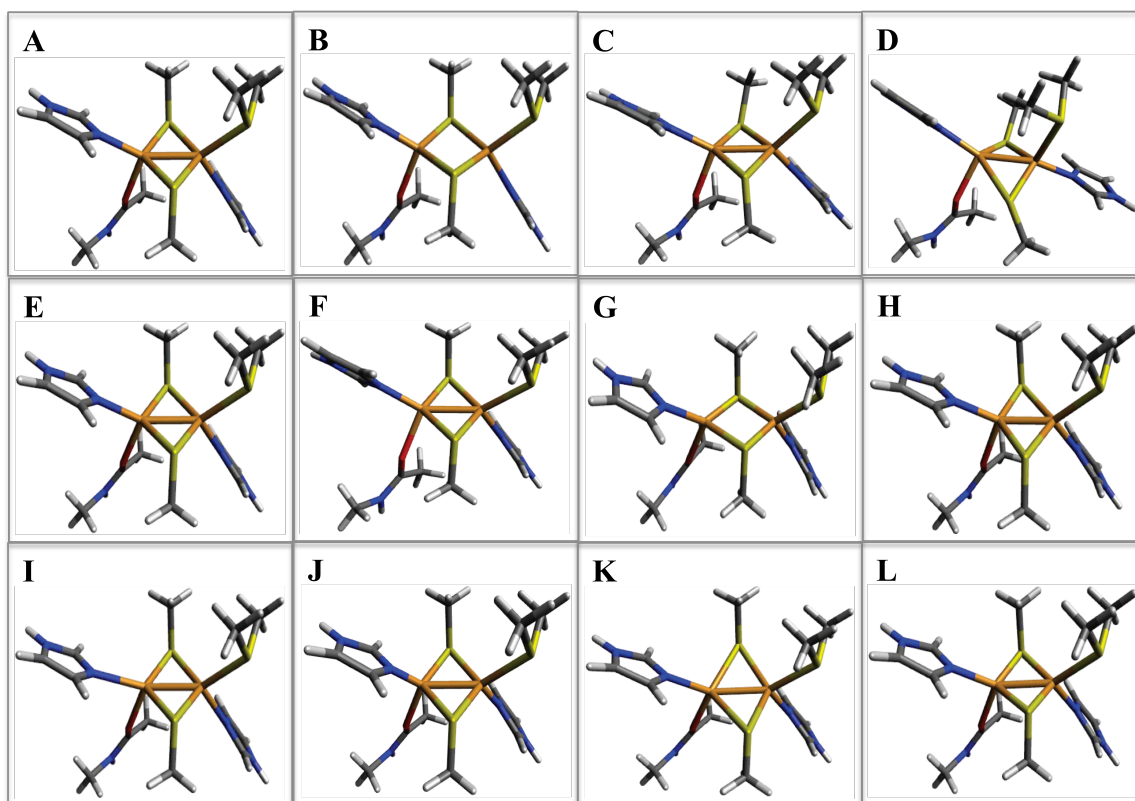

**Fig. S11.** Various starting structures for geometric optimizations: (A) Cu-Cu: 2.5 Å; (B) Cu-Cu: 3.2 Å; (C) Cu-S(Cys)-Cu-S(Cys) dihedral angle: 0°; (D) Cu-S(Cys)-Cu-S(Cys) dihedral angle: 30°; (E) N(His)-Cu-Cu-N(His) dihedral angle: -180°; (F) N(His)-Cu-Cu-N(His) dihedral angle: -150°; (G) accordion distortion of [Cu<sub>2</sub>S<sub>2</sub>] with long Cu-Cu distance: Cu-Cu: 3.3 Å; S-S: 2.9 Å; (H) accordion distortion of [Cu<sub>2</sub>S<sub>2</sub>] with short Cu-Cu distance: Cu-Cu: 2.3 Å; S-S: 4.0 Å; (I) long Cu-N(His): 2.4 Å in average; (J) short Cu-N(His): 1.5 Å in average; (K) long Cu-S(Cys): 2.6 Å in average; and (L) long Cu-S(Cys): Å



**Table S1. The absorption and MCD parameters of resolved electronic transitions for: (A) WT; (B) M123Q; (C) M123L; and (D) M123H.**

(A)

| <b>WT</b>                                                            |       |       |       |       |       |       |       |       |
|----------------------------------------------------------------------|-------|-------|-------|-------|-------|-------|-------|-------|
| band                                                                 | 1     | 2     | 3     | 4     | 5     | 6     | 7     | 9     |
| Energy (cm <sup>-1</sup> )                                           | 13347 | 14714 | 16880 | 18014 | 19730 | 21379 | 23448 | 28835 |
| $\epsilon$ (M <sup>-1</sup> cm <sup>-1</sup> )                       | 1706  | 655   | 846   | 2299  | 2548  | 4053  | 255   | 61    |
| $\Delta\epsilon$ (M <sup>-1</sup> cm <sup>-1</sup> T <sup>-1</sup> ) | -92   | -38   | 28    | 88    | 166   | -198  | -6    | 8     |
| C <sub>0</sub> /D <sub>0</sub>                                       | 0.054 | 0.058 | 0.034 | 0.038 | 0.066 | 0.048 | 0.024 | 0.132 |

(B)

| <b>M123Q</b>                                                         |       |       |       |       |       |       |       |       |
|----------------------------------------------------------------------|-------|-------|-------|-------|-------|-------|-------|-------|
| band                                                                 | 1     | 2     | 3     | 4     | 5     | 6     | 7     | 9     |
| Energy (cm <sup>-1</sup> )                                           | 13369 | 14918 | 16973 | 18211 | 19505 | 21312 | 22232 | 28092 |
| $\epsilon$ (M <sup>-1</sup> cm <sup>-1</sup> )                       | 1651  | 330   | 789   | 1780  | 3229  | 5345  | 168   | 169   |
| $\Delta\epsilon$ (M <sup>-1</sup> cm <sup>-1</sup> T <sup>-1</sup> ) | -116  | -18   | 8     | 98    | 210   | -218  | -24   | 8     |
| C <sub>0</sub> /D <sub>0</sub>                                       | 0.07  | 0.054 | 0.010 | 0.056 | 0.066 | 0.04  | 0.142 | 0.048 |

(C)

| <b>M123L</b>                                                         |       |       |       |       |       |       |       |       |
|----------------------------------------------------------------------|-------|-------|-------|-------|-------|-------|-------|-------|
| band                                                                 | 1     | 2     | 3     | 4     | 5     | 6     | 7     | 9     |
| Energy (cm <sup>-1</sup> )                                           | 12658 | 15391 | 16540 | 17816 | 19753 | 21161 | 22513 | 28567 |
| $\epsilon$ (M <sup>-1</sup> cm <sup>-1</sup> )                       | 1162  | 679   | 635   | 213   | 2245  | 2867  | 340   | 10    |
| $\Delta\epsilon$ (M <sup>-1</sup> cm <sup>-1</sup> T <sup>-1</sup> ) | -66   | 26    | 50    | -26   | 264   | -242  | -12   | 8     |
| C <sub>0</sub> /D <sub>0</sub>                                       | 0.056 | 0.038 | 0.078 | 0.122 | 0.108 | 0.084 | 0.036 | 0.8   |

(D)

| <b>M123H</b>                                                         |       |       |       |       |       |       |       |       |
|----------------------------------------------------------------------|-------|-------|-------|-------|-------|-------|-------|-------|
| band                                                                 | 1     | 2     | 3     | 4     | 5     | 6     | 7     | 10    |
| Energy (cm <sup>-1</sup> )                                           | 11930 | 14432 | 15560 | 17334 | 19687 | 21230 | 22606 | 28367 |
| $\epsilon$ (M <sup>-1</sup> cm <sup>-1</sup> )                       | 1880  | 425   | 297   | 412   | 2318  | 3320  | 668   | 265   |
| $\Delta\epsilon$ (M <sup>-1</sup> cm <sup>-1</sup> T <sup>-1</sup> ) | -60   | 8     | 18    | -4    | 186   | -142  | -24   | 10    |
| C <sub>0</sub> /D <sub>0</sub>                                       | 0.032 | 0.018 | 0.06  | 0.010 | 0.085 | 0.042 | 0.036 | 0.038 |

**Table S2. Simulations of the spin Hamiltonian parameters of WT Cu<sub>A</sub> Az and the M123X (X=Q, L, H) variants.**

| 1*    | $g_z$                                | $g_x$ | $g_y$ | $A_z^{\text{Cu1}}$ | $A_z^{\text{Cu2}}$ | $A_x^{\text{Cu1}}$ | $A_x^{\text{Cu2}}$ | $A_y^{\text{Cu1}}$ | $A_y^{\text{Cu2}}$ |
|-------|--------------------------------------|-------|-------|--------------------|--------------------|--------------------|--------------------|--------------------|--------------------|
|       | (10 <sup>-4</sup> cm <sup>-1</sup> ) |       |       |                    |                    |                    |                    |                    |                    |
| WT    | 2.177                                | 2.022 | 2.022 | 53                 | 53                 | 25                 | 27                 | 25                 | 26                 |
| M123Q | 2.174                                | 2.022 | 2.027 | 61                 | 57                 | 21                 | 29                 | 14                 | 19                 |
| M123L | 2.215                                | 2.004 | 2.057 | 35                 | 35                 | 22                 | 21                 | 23                 | 18                 |
| M123H | 2.255                                | 2.017 | 2.066 | 58                 | 42                 | 23                 | 22                 | 22                 | 30                 |
| 2*    |                                      |       |       |                    |                    |                    |                    |                    |                    |
| WT    | 2.177                                | 2.008 | 2.043 | 63                 | 50                 | 27                 | 31                 | 10                 | 24                 |
| M123Q | 2.174                                | 2.008 | 2.033 | 64                 | 50                 | 25                 | 30                 | 15                 | 20                 |
| M123L | 2.215                                | 2.018 | 2.047 | 40                 | 53                 | 29                 | 29                 | 16                 | 20                 |
| M123H | 2.255                                | 2.014 | 2.064 | 46                 | 52                 | 26                 | 18                 | 30                 | 19                 |

\*1 and 2 correspond to simulations shown in Figure S3 Top and Bottom, respectively.

**Table S3. Selected geometric parameters of Cu<sub>A</sub> Az (PDB ID: 1CC3) and calculated WT and M123X (X=Q, L, H) DFT models.**

|        | Cu-L <sub>axial</sub> * | Cu-Cu | Cu <sub>M</sub> -N(His) | Cu <sub>O</sub> -N(His) | Cu <sub>M</sub> -S(Cys) <sup>†</sup> | Cu <sub>O</sub> -S(Cys) <sup>†</sup> |
|--------|-------------------------|-------|-------------------------|-------------------------|--------------------------------------|--------------------------------------|
| WT-exp | 2.98                    | 2.42  | 2.04                    | 2.06                    | 2.36                                 | 2.38                                 |
| WT     | 2.95                    | 2.49  | 2.02                    | 2.04                    | 2.33                                 | 2.37                                 |
| M123Q  | 4.18                    | 2.47  | 1.99                    | 2.04                    | 2.31                                 | 2.37                                 |
| M123L  | 2.59                    | 2.49  | 2.00                    | 2.05                    | 2.32                                 | 2.37                                 |
| M123H  | 2.36                    | 2.50  | 2.04                    | 2.05                    | 2.35                                 | 2.36                                 |

\* The unit of distance is in Å.

† The distance is average from two Cu<sub>M</sub>-S and Cu<sub>O</sub>-S distances, respectively.

**Table S4. Calculated Cu-O (H<sub>2</sub>O) and Cu<sub>2</sub>S<sub>2</sub> core vibration modes ( $\nu_2$ - $\nu_4$ ) in M123L and their isotope shifts.**

| (cm <sup>-1</sup> )                  | Cu-O(H <sub>2</sub> O) | M123L   |         |         |
|--------------------------------------|------------------------|---------|---------|---------|
|                                      |                        | $\nu_2$ | $\nu_3$ | $\nu_4$ |
| Cu-O(H <sub>2</sub> <sup>16</sup> O) | 108/116                | 239/250 | 272     | 338     |
| Cu-O(D <sub>2</sub> <sup>16</sup> O) | 109/116                | 239/250 | 272     | 338     |
| Cu-O(H <sub>2</sub> <sup>18</sup> O) | 106/113                | 239/250 | 272     | 338     |

**Table S5. Calculated  $g_z$  and the  $\sigma_u^*$  to  $\pi_u$  transition energies and Cu characters in the donor ( $\beta$ ) and acceptor ( $\alpha$ ) orbitals of WT and the M123X (X=Q, L, H) DFT models.**

|                                     | WT    | M123Q | M123L | M123H |
|-------------------------------------|-------|-------|-------|-------|
| $g_z$ (calc.)-DFT                   | 2.192 | 2.190 | 2.209 | 2.214 |
| $\sigma_u^*$ ( $\alpha^2$ )         | 53    | 53    | 54    | 54    |
| $\pi_u$ ( $\beta^2$ )               | 28    | 29    | 30    | 30    |
| $\Delta E$ ( $\sigma_u^* - \pi_u$ ) | 4639  | 4601  | 4478  | 3915  |
| $g_z$ (calc.)-Eq. 1*                | 2.21  | 2.22  | 2.24  | 2.27  |

\*  $g_z$ -values were calculated using Eq 1 and the DFT derived  $\Delta E$ ,  $\alpha^2$ , and  $\beta^2$  values in this table. Note that these show the same trend as those obtained directly from the DFT calculation, which is also consistent with experiment.
